# Supplementary material for: Aggrandized photocatalytic H2O2 and H2 production by a TiO2/Ti3C2–TiC/mixed metal Ce–Zr MOF composite: an interfacial engineered solid-state-mediator-based Z-scheme heterostructure
Source: Royal Society of Chemistry journal article supplement (doi:10.1039/d3ma01176c), 2024-01-01
Supplement: d3ma01176c1.pdf [file d3ma01176c1.pdf]

## Supporting Information

### Aggrandized Photocatalytic H<sub>2</sub>O<sub>2</sub> and H<sub>2</sub> Production by TiO<sub>2</sub>/Ti<sub>3</sub>C<sub>2</sub>- TiC/Mixed Metal Ce-Zr MOF Composite: An Interfacial Engineered Solid- State Mediator Based Z-Scheme Heterostructure

Lijarani Biswal, Suraj Prakash Tripathy, Srabani Dash, Sarmistha Das, Satyabrata Subudhi,  
Kulamani Parida\*

*Centre for Nano Science and Nanotechnology, Siksha "O" Anusnadhan (Deemed to be  
University), Bhubaneswar, Odisha 751030, India*

*\*Corresponding author*

---

---

**\*Corresponding Author's Email:**

*kulamaniparida@soa.ac.in*

*paridakulamani@yahoo.com*

Tel. No.: +91-674-2351777 and Fax. +91-674-2350642

## **1. Characterizations and Experimental Methods:**

### **1.1. Characterization Techniques:**

Powder X-ray Diffraction (XRD) were conducted with a Rigaku Miniflex X-ray diffractometer having a monochromator outfitted with Cu K  $\alpha$  radiation ( $\lambda = 0.154 \text{ nm}$ , 30 KV/50 mA) was utilized to analyzed the crystallographic structure and phase purity of and phase purity of prepared sample. Fourier transform infrared spectroscopy (FTIR) measurement was used to give a more complete characterization of the surface structure. FTIR spectra were obtained with a frequency range between 400 to 4000  $\text{cm}^{-1}$  using a JASCO-FT-IR-4600 spectrometer (with KBr as a reference). X-ray photoelectron spectroscopy (XPS) was carried with a VG Microtech Multilab ESCA-3000 spectrometer using Mg-K $\alpha$  as an X-ray source, to examine the chemical state of the produced samples. The morphological analysis was done by using FEIN Quanta-400 FEG-SEM (FESEM), whereas the internal structure of the as-synthesized sample was analyzed by JEOL-JEM-2100 transmission electron microscope (HRTEM). To determine the absorbance and bandgap of the obtained sample, UV-Vis DRS spectra were investigated by JASCO-V-750 UV-Vis. spectrometer by using BaSO<sub>4</sub> as reference with a range of 200-800 nm. The excitation and emission spectra of photoluminescence (PL) were studied by using a JASCO FP-8300 fluorescence spectrometer having an excitation wavelength 325 nm along with a Xenon lamp as the light source.

### **1.2. Photoelectrochemical Measurements:**

The multi-channel-Ivium potentiostat-galvanostat (IVIUM-n-STAT) electrochemical workstation was used to perform all photo electrochemical measurements, with three electrode configurations consisting of reference (Ag/AgCl), counter (Pt foil) and working electrode (fluorine doped Tin Oxide (FTO)), respectively. The hole workstation was supplied with a 300 W Xenon lamp as visible light source with 400 nm cut-off. 0.1 M Na<sub>2</sub>SO<sub>4</sub> aqueous solution was utilized as electrolyte. Furthermore, working electrode was papered with 10 mg of the sample, 0.7 ml of ethanol, and 1% Nafion (20  $\mu\text{L}$ ), and the resulting slurry was then dropped-cast onto the conducting surface of the FTO substrate. The FTO was given for oven dry at 90 °C for 12 hours to make the functioning electrode. Light source can be performed by using 300 W Xenon lamps equipped with a 400 nm cut-off filter.

### **1.3. Photocatalytic Applications:**

The photocatalytic activities of pure materials (TiO<sub>2</sub>/Ti<sub>3</sub>C<sub>2</sub>-TiC, ZUNH and CZUNH) and TiO<sub>2</sub>/Ti<sub>3</sub>C<sub>2</sub>-TiC/CZUNH-X composites were confirmed by (i) photocatalytic H<sub>2</sub>O<sub>2</sub> and (ii) photocatalytic hydrogen generation.

### **1.3.1. Photocatalytic H<sub>2</sub>O<sub>2</sub> Production:**

In an O<sub>2</sub>-saturated environment, photocatalytic H<sub>2</sub>O<sub>2</sub> generation was carried out using pristine TiO<sub>2</sub>/Ti<sub>3</sub>C<sub>2</sub>-TiC, ZUNH, CZUNH and ternary TiO<sub>2</sub>/Ti<sub>3</sub>C<sub>2</sub>-TiC/CZUNH-X photocatalysts. For thorough dispersion, 0.02 g of photocatalysts were ultrasonicated for 10 minutes in a mixed solution of 19 mL DI water and 1 mL ethanol. Afterward the sample was bubbled with O<sub>2</sub> gas for 30 min to achieve O<sub>2</sub> equilibrated environment followed by irradiation with 250 W Xe lamp. After 2h of light illumination the photocatalysts were separated from the solution through centrifugation and filtration. Then 1 mL of resultant solution was mixed with 2 mL of KI (0.1 M) solution followed by the addition of 0.05 mL of ammonium molybdate (0.01 M) solution to achieve a light-yellow colour. After the addition, the concentration of the H<sub>2</sub>O<sub>2</sub> was measured by a UV-Vis spectrophotometer at a wavelength of 350 nm.

### **1.3.2. Photocatalytic H<sub>2</sub> Production:**

The photocatalytic water splitting reaction was implemented in a Pyrex quartz glass photo reactor containing 20 mg of catalysts (TiO<sub>2</sub>/Ti<sub>3</sub>C<sub>2</sub>-TiC, ZUNH, CZUNH and TiO<sub>2</sub>/Ti<sub>3</sub>C<sub>2</sub>-TiC/CZUNH-X -X (X= 10, 20 and 30 wt % of CZUNH) along with 20 mL of 10 vol% Methanol solution used as sacrificial agent for hole. For this reaction to happen, a visible light source of 125 W Xenon lamp with 1 M NaNO<sub>2</sub> cut off filter connected to the reactor with water circulation. Then the sample was kept on stirring to prevent the catalysts from settling down at the bottom of the reactor followed by purging of N<sub>2</sub> gas for 30 mins. Then the distance between the light source and the suspension solution mixture was measured which was found to be 8.7 cm and the intensity of incident light on the sample surface is measured to be 70 mWcm<sup>-2</sup>. After 1 h of light irradiation, the evolved hydrogen gas was collected via water displacement technique. Then the amount of H<sub>2</sub> evolution was measured by GC-7890B (Agilent technology) supplied with thermal conductivity detector (TCD) and a 5 Å molecular sieve packed column. The apparent conversion efficiency (ACE) was calculated by using the formula.

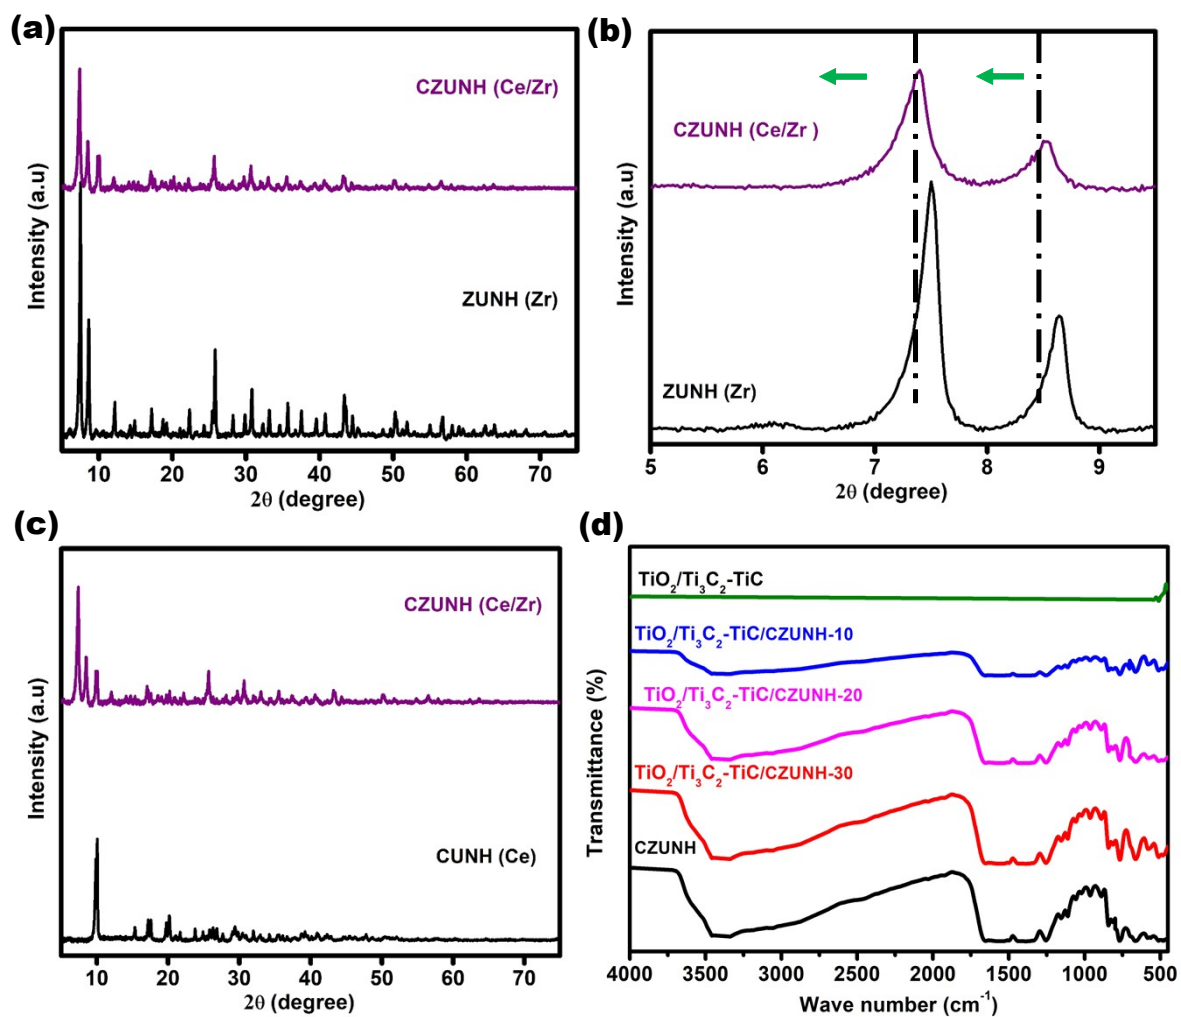

**Figure S1.** (a) XRD patterns of CZUNH and ZUNH (b) Zoom image of XRD patterns of CZUNH and ZUNH (c) XRD patterns of CUNH (d) FTIR spectra of all as-synthesized heterostructures.

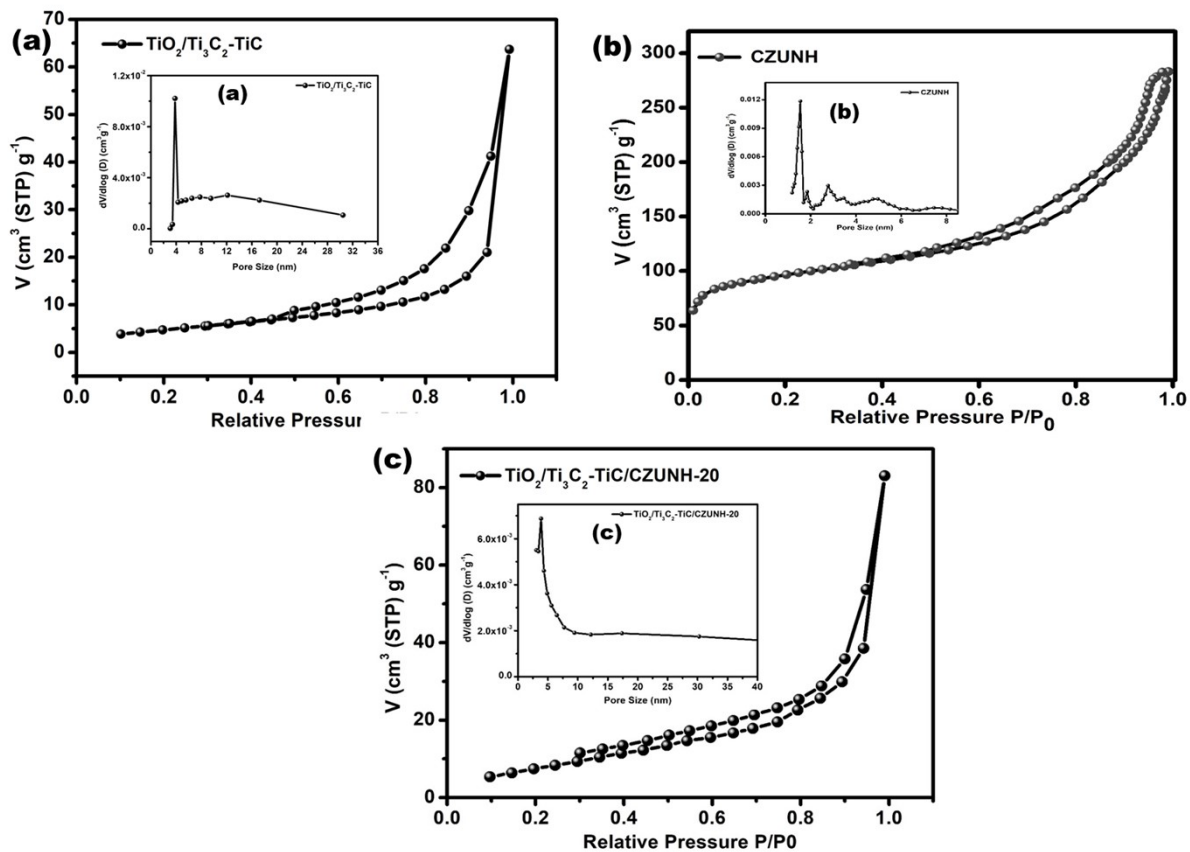

**Figure S2.** BET surface area (a)  $\text{TiO}_2/\text{Ti}_3\text{C}_2\text{-TiC}$  (b) CZUNH (c)  $\text{TiO}_2/\text{Ti}_3\text{C}_2\text{-TiC/CZUNH-20}$  and insert image represented pore size distribution of (a)  $\text{TiO}_2/\text{Ti}_3\text{C}_2\text{-TiC}$  (b) CZUNH (c)  $\text{TiO}_2/\text{Ti}_3\text{C}_2\text{-TiC/CZUNH-20}$ .

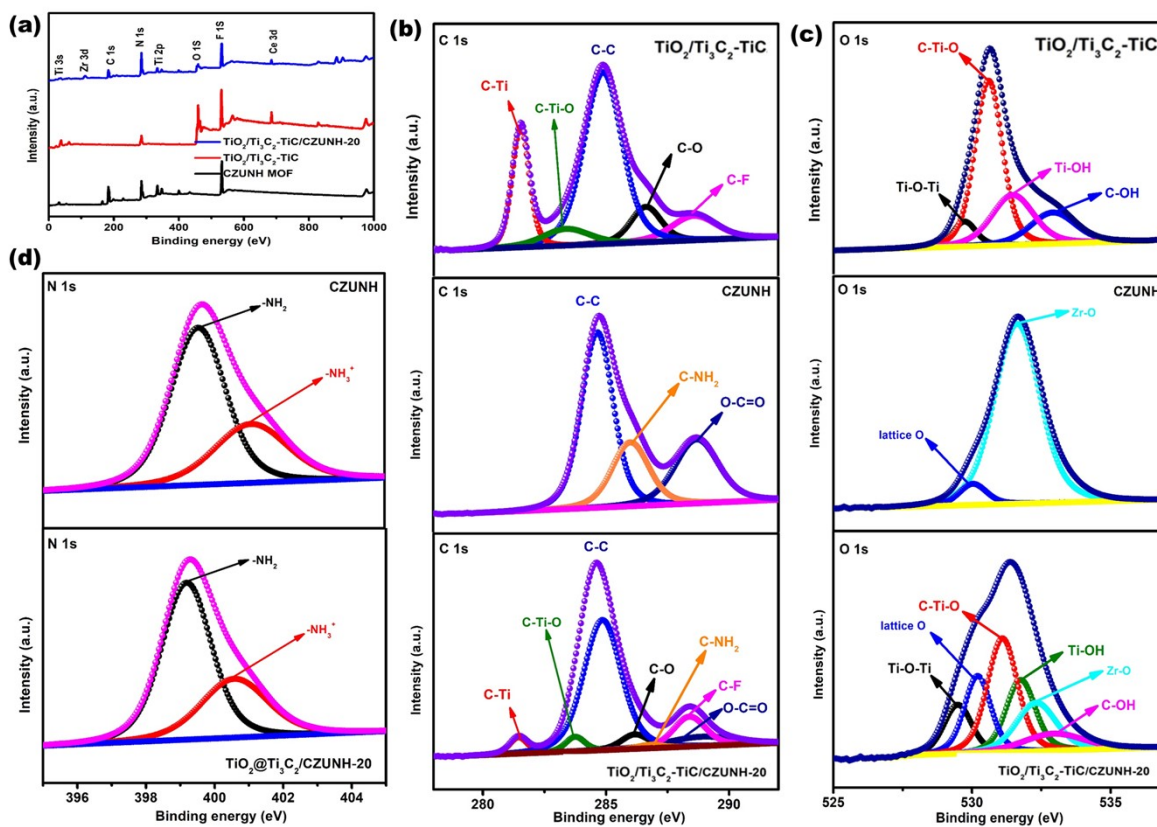

**Figure S3.** (a) XPS survey scan of CZUNH,  $\text{TiO}_2/\text{Ti}_3\text{C}_2\text{-TiC}$  and  $\text{TiO}_2/\text{Ti}_3\text{C}_2\text{-TiC}/\text{CZUNH-20}$  composite, XPS spectra of (b) C 1s, (c) O 1s and (d) N 1s for  $\text{TiO}_2/\text{Ti}_3\text{C}_2\text{-TiC}$ , CZUNH and  $\text{TiO}_2/\text{Ti}_3\text{C}_2\text{-TiC}/\text{CZUNH-20}$  composite.

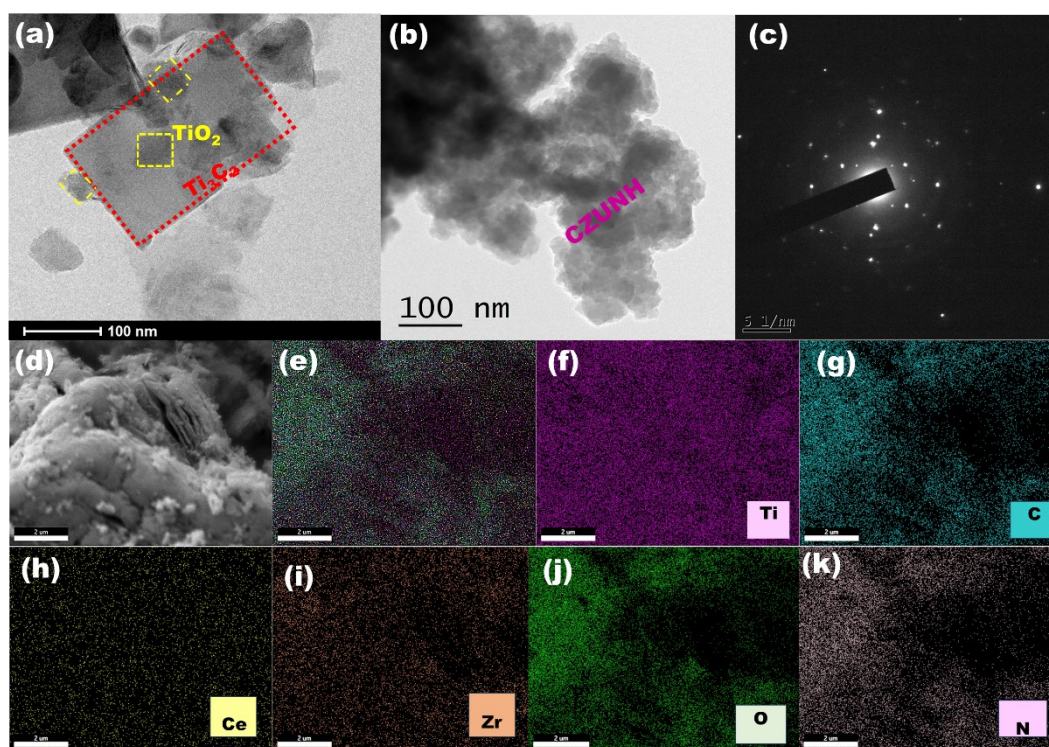

**Figure S4.** HRTEM image (a)  $\text{TiO}_2/\text{Ti}_3\text{C}_2\text{-TiC}$  (b) CZUNH (c) SAED patterns of  $\text{TiO}_2/\text{Ti}_3\text{C}_2\text{-TiC/CZUNH-20}$  composite and (d-e) EDX colour mapping images of Ti, C, Zr, Ce, O and N elements (f-k) of the  $\text{TiO}_2/\text{Ti}_3\text{C}_2\text{-TiC/CZUNH-20}$  composite.

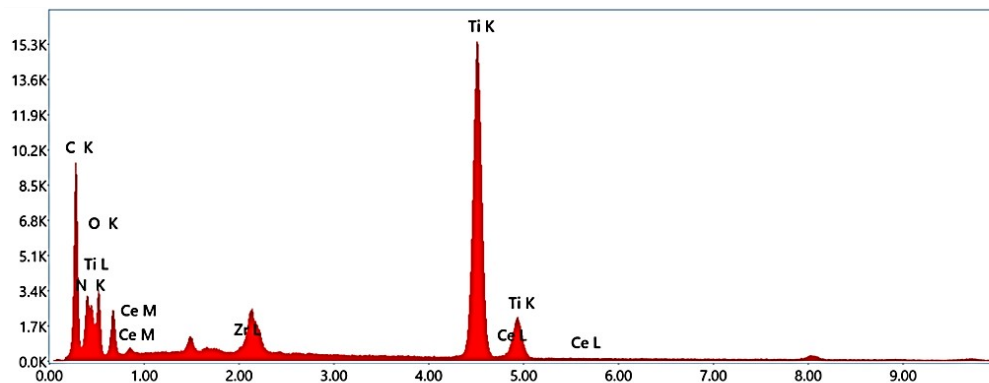

**Figure S5.** EDX spectra of  $\text{TiO}_2/\text{Ti}_3\text{C}_2\text{-TiC/CZUNH-20}$ .

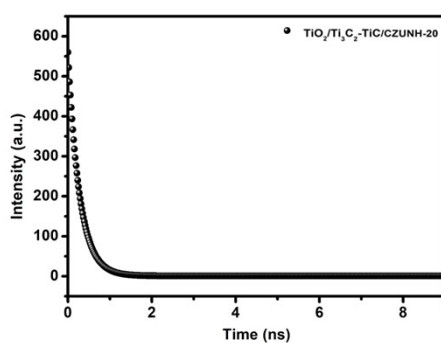

**Figure S6.** TRPL spectra of  $\text{TiO}_2/\text{Ti}_3\text{C}_2\text{-TiC/CZUNH-20}$ .

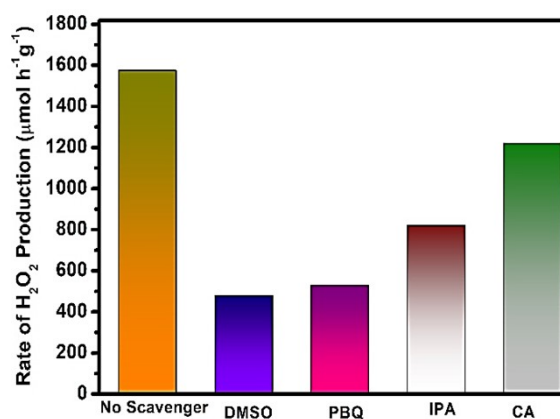

**Figure S7.** Influence of scavenging agent (PBQ for  $\bullet\text{O}_2^-$ ; IPA for  $\bullet\text{OH}$ ; CA for  $\text{h}^+$ ; DMSO for  $\text{e}^-$ ) on photocatalytic  $\text{H}_2\text{O}_2$  production ability over ternary composite  $\text{TiO}_2/\text{Ti}_3\text{C}_2\text{-TiC/CZUNH-20}$ .

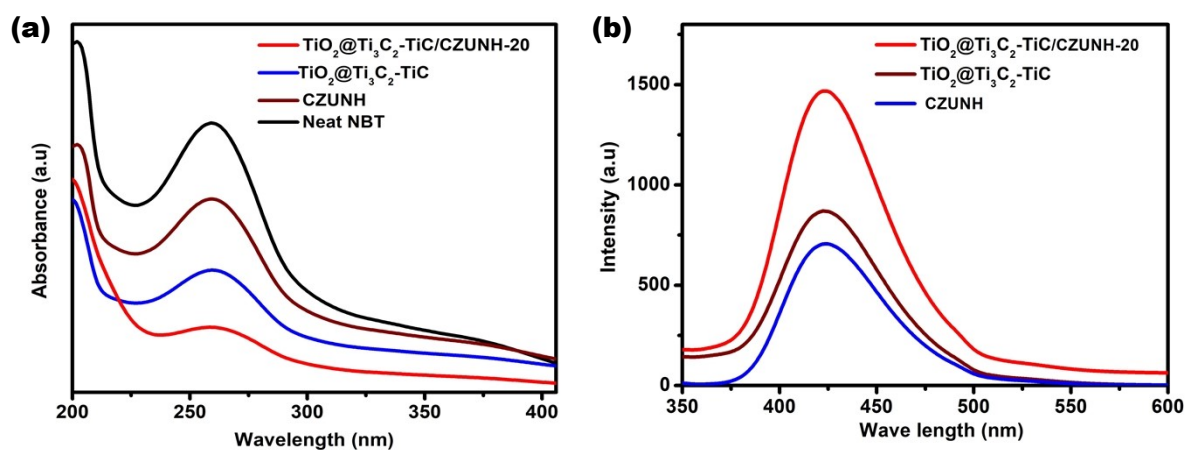

**Fig. S8** (a) NBT (b) TA test for CZUNH, TiO<sub>2</sub>/Ti<sub>3</sub>C<sub>2</sub>-TiC and TiO<sub>2</sub>/Ti<sub>3</sub>C<sub>2</sub>-TiC/CZUNH-20 composite.

**Table S1.** Comparison table for Photocatalytic H<sub>2</sub>O<sub>2</sub> production by various photocatalyst

| Sl. No. | Materials                                                              | Amount of catalysts (mg) | Sacrificial reagent                   | Light source                   | H <sub>2</sub> O <sub>2</sub> production rate | Reference |
|---------|------------------------------------------------------------------------|--------------------------|---------------------------------------|--------------------------------|-----------------------------------------------|-----------|
| 1       | TiO <sub>2</sub> /Ti <sub>3</sub> C <sub>2</sub> -TiC/CZUNH-20         | 20                       | Ethanol/ H <sub>2</sub> O (20 mL)     | 125 W Xe lamp (> 400 nm)       | 1575                                          | This work |
| 2       | Ti <sub>3</sub> C <sub>2</sub> /g-C <sub>3</sub> N <sub>4</sub> /BiOCl | 50                       | 5 vol% IPA/ H <sub>2</sub> O (50 mL)  | 300 W Xenon lamp               | 1275 μM                                       | 1         |
| 3       | Ti <sub>3</sub> C <sub>2</sub> /g-C <sub>3</sub> N <sub>4</sub> TC-pCN | 50                       | 10 vol% IPA/ H <sub>2</sub> O (50 mL) | Visible light source (≥400 nm) | 2.20 μmol L <sup>-1</sup> min <sup>-1</sup>   | 2         |
| 4       | Pt@b-CD/g-C <sub>3</sub> N <sub>4</sub> -MXene                         | 60                       | Water (60 mL)                         | Visible light source (≥400 nm) | 147.1 mM L <sup>-1</sup>                      | 3         |
| 5       | TiO <sub>2</sub> @MXene/B g C <sub>3</sub> N <sub>4</sub>              | 20                       | Ethanol/ H <sub>2</sub> O (20 mL)     | Visible light source           | 1480.1 μmol h <sup>-1</sup> g <sup>-1</sup>   | 4         |



|  |  |  |  |                                |  |  |
|--|--|--|--|--------------------------------|--|--|
|  |  |  |  | 300 W Xe lamp ( $\geq 400$ nm) |  |  |
|--|--|--|--|--------------------------------|--|--|

**Table S2.** Comparison table for photocatalytic H<sub>2</sub> evolution by various photocatalyst

| Sl. No. | Materials                                                                          | Amount of catalysts (mg) | Sacrificial reagent                                   | Light source                   | H <sub>2</sub> production rate ( $\mu\text{mol}\cdot\text{g}^{-1}\text{h}^{-1}$ ) | Reference |
|---------|------------------------------------------------------------------------------------|--------------------------|-------------------------------------------------------|--------------------------------|-----------------------------------------------------------------------------------|-----------|
| 1       | TiO <sub>2</sub> /Ti <sub>3</sub> C <sub>2</sub> -TiC/CZUNH-20                     | 20                       | Methanol                                              | 125 W Xe lamp (> 400 nm)       | 570                                                                               | This work |
| 2       | MoS <sub>2</sub> @Ti <sub>3</sub> C <sub>2</sub> @TiO <sub>2</sub>                 | 10                       | TEOA                                                  | 300 W Xe arc lamp (> 400 nm)   | 6425.297                                                                          | 5         |
| 3       | 1 T-MoS <sub>2</sub> nanopatch/Ti <sub>3</sub> C <sub>2</sub> /TiO <sub>2</sub>    | 10                       | TEOA and aqueous acetone                              | 300 W Xe lamp ( $\geq 420$ nm) | 9738                                                                              | 6         |
| 4       | Ti <sub>3</sub> C <sub>2</sub> /TiO <sub>2</sub> /UiO-66- NH                       | 20                       | Na <sub>2</sub> S and Na <sub>2</sub> SO <sub>3</sub> | 300 W Xe lamp                  | 1980                                                                              | 7         |
| 5       | Cu/TiO <sub>2</sub> /Ti <sub>3</sub> C <sub>2</sub> T <sub>x</sub>                 | 20                       | Methanol                                              | 300 W Xe lamp                  | 1892                                                                              | 8         |
| 6       | ZnIn <sub>2</sub> S <sub>4</sub> /TiO <sub>2</sub> /Ti <sub>3</sub> C <sub>2</sub> | 15                       | Na <sub>2</sub> S and Na <sub>2</sub> SO <sub>3</sub> | 300 W Xe lamp                  | 1185.8                                                                            | 9         |

|   |                                                                                        |    |          |                                |        |    |
|---|----------------------------------------------------------------------------------------|----|----------|--------------------------------|--------|----|
| 7 | CuIn <sub>2</sub> S <sub>4</sub> /TiO <sub>2</sub> /<br>Ti <sub>3</sub> C <sub>2</sub> | 10 | Methanol | 300 W Xe<br>lamp               | 356.27 | 10 |
| 8 | Ru/MXene/Ti<br>O <sub>2</sub>                                                          | 10 | Methanol | 300 W Xe<br>lamp               | 235.3  | 11 |
| 9 | TiO <sub>2</sub> @Ti <sub>3</sub> C <sub>2</sub> /M<br>IS                              | 20 | Methanol | 125 W Xe<br>lamp<br>(> 400 nm) | 520.3  | 12 |

### Calculation of Apparent Conversion Efficiency (ACE) of TiO<sub>2</sub>/Ti<sub>3</sub>C<sub>2</sub>- TiC/CZUNH-20 Composite:

$$\text{ACE} = \frac{\text{Stored chemical energy}}{\text{incident photon energy}} \times 100 \quad (\text{S1})$$

$$\Rightarrow \text{Stored chemical energy} = \text{moles of H}_2 \text{ evolution} \times \Delta H_c$$

$$= 0.1445 \mu\text{mol/s} \times 285.8 \text{ kJ/mol} = 0.041 \text{ J/s or W}$$

$$\Rightarrow \text{Incident photon energy} = 70 \text{ mWcm}^{-2} \times (\text{Area of spherical surface on which light falls})$$

$$= 70 \text{ mWcm}^{-2} \times 3.141 \times (1.5 \text{ cm})^2 = 0.4947 \text{ W}$$

$$\Rightarrow \text{ACE} = \frac{0.041 \text{ W}}{0.4947 \text{ W}} \times 100 = 9.1 \%$$

Where,  $\Delta H_c$  = Enthalpy of combustion of H<sub>2</sub> = 285.8 kJ mol<sup>-1</sup>

#### References:

1. Q. Yang, R. Li, S. Wei and R. Yang, *Appl. Surf. Sci.*, 2022, **572**, 151525.
2. Y. Yang, Z. Zeng, G. Zeng, D. Huang, R. Xiao, C. Zhang, C. Zhou, W. Xiong, W. Wang, M. Cheng and W. Xue, *Applied Catalysis B: Environmental*, 2019, **258**, 117956.
3. H. Zhu, Q. Xue, G. Zhu, Y. Liu, X. Dou and X. Yuan, *Journal of Materials Chemistry A*, 2021, **9**, 6872-6880.
4. B.P. Mishra, L. Biswal, S. Das, L. Acharya, and K. Parida, *Langmuir*, 2023, **39**, 957-971.
5. Y. Li, Z. Yin, G. Ji, Z. Liang, Y. Xue, Y. Guo, J. Tian, X. Wang and H. Cui, *Appl. Catal. B.*, 2019, **246** 12-20.

6. Y. Li, S. Yang, Z. Liang, Y. Xue, H. Cui and J. Tian, *Mater. Chem. Front.*, 2019, **3**, 2673-2680.
7. P. Tian, X. He, L. Zhao, W. Li, W. Fang, H. Chen, F. Zhang, Z. Huang and H. Wang, *Int. J. Hydrog. Energy.*, 2019, **44**, 788-800.
8. C. Peng, P. Wei, X. Li, Y. Liu, Y. Cao, H. Wang, H. Yu, F. Peng, L. Zhang and B. Zhang, *Nano Energy.*, 2018, **53**, 97-107.
9. K. Huang, C. Li and X. Meng, *J. Colloid Interface Sci.*, 2020, **580**, 669-680.
10. W. Yang, G. Ma, Y. Fu, K. Peng, H. Yang, X. Zhan, W. Yang, L. Wang and H. Hou, *Chem. Eng. J.*, 2022, **429**, 132381.
11. Y. Liu, Y.-H. Li, X. Li, Q. Zhang, H. Yu, X. Peng and F. Peng, *ACS Nano*, 2020, **14**, 14181-14189.
